# Supplementary material
Source: PubMed Central journal article supplement (PMC4866880)

**Supplemental figure 1** Cross-sectional comparison of CD34+ peripheral blood fibrocytes in subjects without coronary artery disease, with chronic stable angina, and with unstable angina. Each data point represents one subject; horizontal lines designate the medians. CAD, coronary artery disease; Col1, collagen-1.

CD34+ fibrocytes  
CD45+ Col1+ CD34+

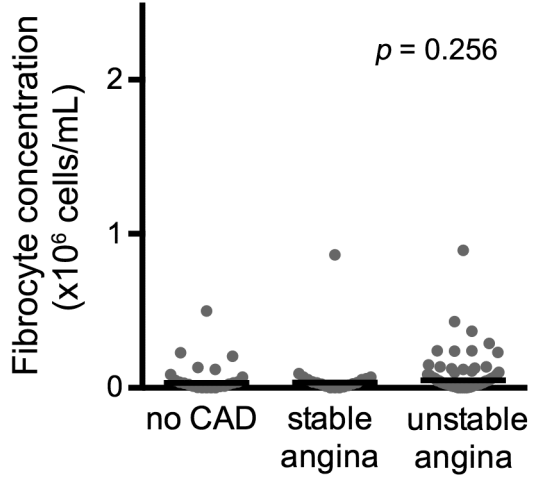

Supplement: NIHMS766696-supplement-supplement_1.pdf [file NIHMS766696-supplement-supplement_1.pdf]
